# Supplementary material for: Selective Probiotic Treatment Positively Modulates the Microbiota–Gut–Brain Axis in the BTBR Mouse Model of Autism
Source: MDPI journal article supplement (doi:10.3390/brainsci12060781), 2022-06-14
Supplement: s1 [file s1]

**Table S1.** High-resolution respirometry was performed using an Oroboros Oxygraph-2K (Oroboros Instruments, Austria), which enables interrogation of mitochondrial function in intact tissue. Following dissection, 2 mg of prefrontal cortex and hippocampus was quickly weighed and transferred into calibrated Oxygraph-2K chambers containing MiR05 respiration medium. Following saponin permeabilization, the final substrate-inhibitor-uncoupled titrations were employed. Injections were performed in the same order as listed here. Oxygen concentration and oxygen flux per tissue mass (pmol O<sub>2</sub>·s<sup>-1</sup>·mg<sup>-1</sup>) were recorded using DatLab software (Oroboros Instruments, Austria).

| Substrates                                                  | Final Concentration    | Function                                                                        |
|-------------------------------------------------------------|------------------------|---------------------------------------------------------------------------------|
| Saponin                                                     | 20 mM                  | Plasma membrane permeabilization                                                |
| Pyruvate                                                    | 5 mM                   | NADH-generating substrate                                                       |
| Malate                                                      | 2 mM                   | NADH-generating substrate                                                       |
| Glutamate                                                   | 10 mM                  | NADH-generating substrate                                                       |
| Adenosine diphosphate (ADP)                                 | 2.5 mM                 | Substrate of ADP/ATP translocase (ANT) and ATP synthase                         |
| Cytochrome C                                                | 10 µM                  | Test integrity of outer mitochondrial membrane                                  |
| Succinate                                                   | 10 mM                  | Substrate of Complex II                                                         |
| Carbonyl cyanide p-trifluoro-methoxyphenyl hydrazone (FCCP) | 1 µM<br>(0.5 µM steps) | Uncoupler and protonophore; induce maximum oxygen flux to determine ET capacity |
| Rotenone                                                    | 0.5 µM                 | Inhibitor of Complex I and NADH oxidation                                       |
| Antimycin A (Ant)                                           | 2.5 µM                 | Inhibitor of Complex III                                                        |

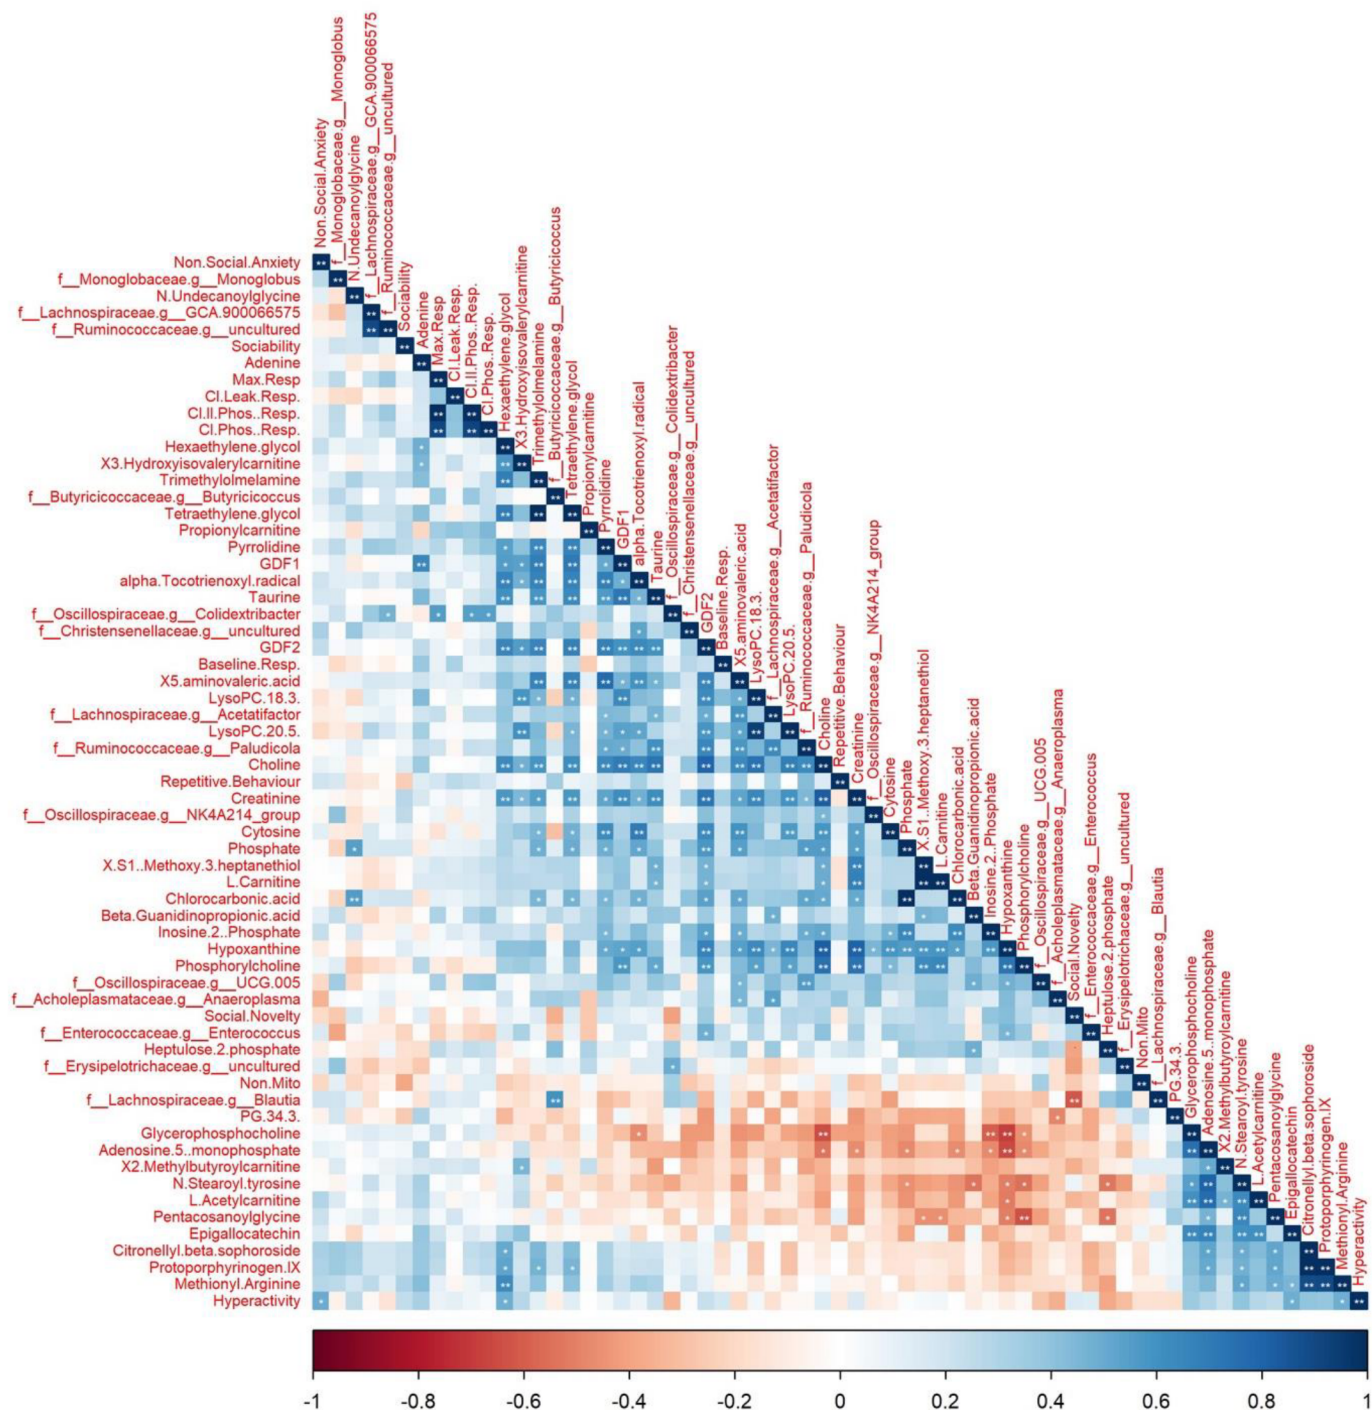

**Figure S1.** Heatmap showing significant correlations between gut microbial, metabolite, mitochondrial respiration, and behavioural data. Box colours represent Pearson's coefficient ( $r$ ) value. \* $p < 0.01$ , \*\* $p < 0.001$ .
